# Supplementary material
Source: publisher figshare collection journal article supplement (https://tandf.figshare.com/articles/dataset/_/3413368)
Supplement: Supplementary file 1 [file 1]

Appendix 1. This appendix was part of the submitted manuscript and has been peer reviewed. It is posted as supplied by the authors.

### Eligibility for Physiotherapy ICU Delphi Panel

You have been identified as potentially meeting our eligibility criteria. Answering the following six short questions will allow us to establish your eligibility. Fulfilling the eligibility criteria does not necessarily mean you will be invited to take part.

If you have any questions, please don't hesitate to contact the Survey Administrator,  
[REDACTED] at [REDACTED]

1. What is your full name and email address?  
*Free-text response field*
2. How many years of clinical experience have you worked as a physiotherapist (full-time equivalent)?  
*Free-text response field*
3. How many years of experience do you have working clinically in ICU (full-time equivalent)?  
*Free-text response field*
4. How many years of experience do you have working in a senior role in ICU (full-time equivalent)?  
*Free-text response field*
5. Do you/have you train(ed) qualified physiotherapists in ICU?  
Yes/No
6. Have you continued clinical practice in ICU in the past two years?  
Yes/No
7. How many published manuscripts do you have in the area of cardiorespiratory physiotherapy (including co-author)?  
*Free-text response field*
8. How many published manuscripts do you have in the area of ICU (including co-author)?  
*Free-text response field*
9. How many free-paper presentations do you have in the area of ICU (including co- author):  
*Free-text response field*
10. Would you be willing to participate?  
Yes/No

Thank you! We anticipate approaching potential participants within four weeks of this survey.
